# Supplementary material
Source: publisher site journal article supplement (https://www.spandidos-publications.com/3310/downloadSupplementary)
Supplement: Supplementary file 1 [file downloadSupplementary]

## Sheet: miR-106a-5p
Table SII. Biological processes.
Analysis Type:	PANTHER Overrepresentation Test (Released 20181113)
Annotation Version and Release Date:	GO Ontology database Released 2018-12-01
Analyzed List:	upload_1 (Homo sapiens)
Reference List:	Homo sapiens (all genes in database)
Test Type:	FISHER
Correction:	BONFERRONI
Bonferroni count:	8723
GO biological process complete	Homo sapiens - REFLIST (20996)	Number of genes upload	Expected value	(over/under)	Fold Enrichment	P-value
regulation of G1/S transition of mitotic cell cycle (GO:2000045)	142	22	6.49	+	3.39	2.50×10-02
regulation of cell cycle G1/S phase transition (GO:1902806)	160	23	7.31	+	3.15	4.60×10-02
regulation of Ras protein signal transduction (GO:0046578)	238	33	10.87	+	3.04	9.54×10-04
regulation of small GTPase mediated signal transduction (GO:0051056)	339	46	15.48	+	2.97	5.75×10-06
axonogenesis (GO:0007409)	362	46	16.53	+	2.78	3.73×10-05
positive regulation of cell cycle process (GO:0090068)	285	36	13.02	+	2.77	2.05×10-03
cell morphogenesis involved in neuron differentiation (GO:0048667)	421	53	19.23	+	2.76	3.31×10-06
axon development (GO:0061564)	398	48	18.18	+	2.64	9.37×10-05
protein polyubiquitination (GO:0000209)	249	30	11.37	+	2.64	4.79×10-02
positive regulation of cell cycle (GO:0045787)	395	47	18.04	+	2.61	1.81×10-04
positive regulation of cellular catabolic process (GO:0031331)	353	42	16.12	+	2.60	1.09×10-03
negative regulation of transcription by RNA polymerase II (GO:0000122)	855	98	39.05	+	2.51	1.92×10-11
neuron projection morphogenesis (GO:0048812)	472	53	21.56	+	2.46	1.30×10-04
cell morphogenesis involved in differentiation (GO:0000904)	537	60	24.53	+	2.45	2.20×10-05
plasma membrane bounded cell projection morphogenesis (GO:0120039)	476	53	21.74	+	2.44	1.63×10-04
cell projection morphogenesis (GO:0048858)	477	53	21.79	+	2.43	1.73×10-04
enzyme linked receptor protein signaling pathway (GO:0007167)	697	77	31.84	+	2.42	1.54×10-07
positive regulation of catabolic process (GO:0009896)	420	46	19.18	+	2.40	2.23×10-03
ubiquitin-dependent protein catabolic process (GO:0006511)	499	54	22.79	+	2.37	3.13×10-04
regulation of GTPase activity (GO:0043087)	482	52	22.02	+	2.36	6.29×10-04
modification-dependent protein catabolic process (GO:0019941)	505	54	23.07	+	2.34	4.21×10-04
forebrain development (GO:0030900)	385	41	17.59	+	2.33	2.64×10-02
cell part morphogenesis (GO:0032990)	498	53	22.75	+	2.33	6.41×10-04
modification-dependent macromolecule catabolic process (GO:0043632)	516	54	23.57	+	2.29	9.30×10-04
transmembrane receptor protein tyrosine kinase signaling pathway (GO:0007169)	494	51	22.56	+	2.26	3.00×10-03
positive regulation of GTPase activity (GO:0043547)	409	42	18.68	+	2.25	3.42×10-02
neuron development (GO:0048666)	801	82	36.59	+	2.24	1.03×10-06
negative regulation of transcription, DNA-templated (GO:0045892)	1180	120	53.90	+	2.23	3.59×10-11
positive regulation of transcription by RNA polymerase II (GO:0045944)	1199	121	54.76	+	2.21	5.18×10-11
neuron projection development (GO:0031175)	657	66	30.01	+	2.20	1.35×10-04
cellular protein catabolic process (GO:0044257)	591	59	26.99	+	2.19	1.19×10-03
proteolysis involved in cellular protein catabolic process (GO:0051603)	561	56	25.62	+	2.19	1.99×10-03
negative regulation of cell cycle (GO:0045786)	532	53	24.30	+	2.18	4.73×10-03
protein phosphorylation (GO:0006468)	935	93	42.71	+	2.18	1.96×10-07
negative regulation of nucleic acid-templated transcription (GO:1903507)	1228	121	56.09	+	2.16	3.16×10-10
negative regulation of RNA biosynthetic process (GO:1902679)	1230	121	56.18	+	2.15	3.28×10-10
neuron differentiation (GO:0030182)	989	97	45.17	+	2.15	1.40×10-07
negative regulation of cellular macromolecule biosynthetic process (GO:2000113)	1375	134	62.80	+	2.13	2.09×10-11
regulation of protein serine/threonine kinase activity (GO:0071900)	503	49	22.97	+	2.13	2.20×10-02
skeletal system development (GO:0001501)	494	48	22.56	+	2.13	3.01×10-02
positive regulation of transcription, DNA-templated (GO:0045893)	1532	148	69.97	+	2.12	9.56×10-13
protein catabolic process (GO:0030163)	657	63	30.01	+	2.10	1.83×10-03
positive regulation of RNA metabolic process (GO:0051254)	1703	163	77.79	+	2.10	3.52×10-14
regulation of kinase activity (GO:0043549)	851	81	38.87	+	2.08	2.98×10-05
regulation of anatomical structure morphogenesis (GO:0022603)	1011	96	46.18	+	2.08	1.02×10-06
positive regulation of nucleic acid-templated transcription (GO:1903508)	1618	153	73.90	+	2.07	1.26×10-12
positive regulation of RNA biosynthetic process (GO:1902680)	1619	153	73.95	+	2.07	1.31×10-12
negative regulation of RNA metabolic process (GO:0051253)	1317	124	60.15	+	2.06	2.18×10-09
negative regulation of macromolecule biosynthetic process (GO:0010558)	1450	136	66.23	+	2.05	1.71×10-10
negative regulation of cellular biosynthetic process (GO:0031327)	1510	141	68.97	+	2.04	7.05×10-11
negative regulation of cell population proliferation (GO:0008285)	679	63	31.01	+	2.03	4.68×10-03
cell morphogenesis (GO:0000902)	693	64	31.65	+	2.02	3.91×10-03
negative regulation of biosynthetic process (GO:0009890)	1535	141	70.11	+	2.01	2.99×10-10
regulation of protein kinase activity (GO:0045859)	773	71	35.31	+	2.01	1.00×10-03
brain development (GO:0007420)	730	67	33.34	+	2.01	2.83×10-03
negative regulation of nucleobase-containing compound metabolic process (GO:0045934)	1450	133	66.23	+	2.01	2.05×10-09
regulation of transferase activity (GO:0051338)	960	88	43.85	+	2.01	3.30×10-05
positive regulation of nucleobase-containing compound metabolic process (GO:0045935)	1889	173	86.28	+	2.01	1.53×10-13
neurogenesis (GO:0022008)	1597	145	72.94	+	1.99	2.13×10-10
transcription, DNA-templated (GO:0006351)	651	59	29.73	+	1.98	1.98×10-02
nucleic acid-templated transcription (GO:0097659)	652	59	29.78	+	1.98	2.04×10-02
positive regulation of hydrolase activity (GO:0051345)	763	69	34.85	+	1.98	3.15×10-03
head development (GO:0060322)	775	70	35.40	+	1.98	2.49×10-03
generation of neurons (GO:0048699)	1499	135	68.47	+	1.97	3.24×10-09
regulation of cell cycle (GO:0051726)	1137	102	51.93	+	1.96	6.01×10-06
regulation of phosphorylation (GO:0042325)	1517	136	69.29	+	1.96	4.03×10-09
regulation of cell migration (GO:0030334)	816	73	37.27	+	1.96	1.95×10-03
regulation of cellular catabolic process (GO:0031329)	783	70	35.76	+	1.96	4.39×10-03
positive regulation of transferase activity (GO:0051347)	638	57	29.14	+	1.96	4.20×10-02
regulation of cell motility (GO:2000145)	875	78	39.97	+	1.95	8.27×10-04
RNA biosynthetic process (GO:0032774)	663	59	30.28	+	1.95	3.71×10-02
negative regulation of developmental process (GO:0051093)	923	82	42.16	+	1.95	4.53×10-04
negative regulation of gene expression (GO:0010629)	1689	150	77.15	+	1.94	3.73×10-10
positive regulation of macromolecule biosynthetic process (GO:0010557)	1871	166	85.46	+	1.94	1.40×10-11
nervous system development (GO:0007399)	2305	204	105.28	+	1.94	3.05×10-15
regulation of catabolic process (GO:0009894)	901	79	41.15	+	1.92	1.26×10-03
positive regulation of cellular biosynthetic process (GO:0031328)	1965	172	89.75	+	1.92	1.45×10-11
positive regulation of gene expression (GO:0010628)	1957	171	89.39	+	1.91	2.03×10-11
regulation of protein phosphorylation (GO:0001932)	1401	122	63.99	+	1.91	4.27×10-07
regulation of neurogenesis (GO:0050767)	793	69	36.22	+	1.90	1.24×10-02
regulation of transcription by RNA polymerase II (GO:0006357)	2656	231	121.31	+	1.90	4.15×10-17
regulation of phosphate metabolic process (GO:0019220)	1716	149	78.38	+	1.90	2.33×10-09
positive regulation of protein phosphorylation (GO:0001934)	980	85	44.76	+	1.90	6.91×10-04
regulation of phosphorus metabolic process (GO:0051174)	1718	149	78.47	+	1.90	3.45×10-09
positive regulation of biosynthetic process (GO:0009891)	1997	173	91.21	+	1.90	2.33×10-11
regulation of cell development (GO:0060284)	913	79	41.70	+	1.89	2.27×10-03
animal organ morphogenesis (GO:0009887)	925	80	42.25	+	1.89	1.79×10-03
phosphorylation (GO:0016310)	1272	110	58.10	+	1.89	7.82×10-06
positive regulation of phosphorylation (GO:0042327)	1031	89	47.09	+	1.89	3.96×10-04
positive regulation of catalytic activity (GO:0043085)	1416	122	64.68	+	1.89	8.16×10-07
central nervous system development (GO:0007417)	953	82	43.53	+	1.88	1.70×10-03
tube development (GO:0035295)	832	71	38.00	+	1.87	1.45×10-02
regulation of developmental process (GO:0050793)	2486	212	113.55	+	1.87	2.64×10-14
negative regulation of nitrogen compound metabolic process (GO:0051172)	2334	199	106.61	+	1.87	4.68×10-13
regulation of cell differentiation (GO:0045595)	1733	147	79.16	+	1.86	2.44×10-08
cell development (GO:0048468)	1598	135	72.99	+	1.85	2.94×10-07
positive regulation of molecular function (GO:0044093)	1764	149	80.57	+	1.85	2.39×10-08
positive regulation of protein modification process (GO:0031401)	1197	101	54.67	+	1.85	1.30×10-04
regulation of protein modification process (GO:0031399)	1792	151	81.85	+	1.84	1.52×10-08
regulation of locomotion (GO:0040012)	951	80	43.44	+	1.84	5.77×10-03
protein modification by small protein conjugation or removal (GO:0070647)	929	78	42.43	+	1.84	7.05×10-03
regulation of multicellular organismal development (GO:2000026)	1945	163	88.84	+	1.83	2.36×10-09
regulation of cellular component movement (GO:0051270)	956	80	43.67	+	1.83	6.29×10-03
negative regulation of cellular metabolic process (GO:0031324)	2501	209	114.23	+	1.83	4.46×10-13
circulatory system development (GO:0072359)	853	71	38.96	+	1.82	3.04×10-02
positive regulation of cell differentiation (GO:0045597)	951	79	43.44	+	1.82	9.11×10-03
regulation of intracellular signal transduction (GO:1902531)	1844	153	84.23	+	1.82	3.03×10-08
positive regulation of cellular component organization (GO:0051130)	1209	100	55.22	+	1.81	3.52×10-04
regulation of nervous system development (GO:0051960)	899	74	41.06	+	1.80	3.34×10-02
positive regulation of developmental process (GO:0051094)	1340	110	61.20	+	1.80	1.02×10-04
intracellular signal transduction (GO:0035556)	1659	136	75.78	+	1.79	1.45×10-06
positive regulation of phosphorus metabolic process (GO:0010562)	1103	90	50.38	+	1.79	3.41×10-03
positive regulation of phosphate metabolic process (GO:0045937)	1103	90	50.38	+	1.79	3.41×10-03
positive regulation of nitrogen compound metabolic process (GO:0051173)	3128	254	142.87	+	1.78	1.55×10-15
negative regulation of macromolecule metabolic process (GO:0010605)	2589	210	118.25	+	1.78	7.01×10-12
positive regulation of cellular metabolic process (GO:0031325)	3246	263	148.26	+	1.77	2.93×10-16
cellular response to endogenous stimulus (GO:0071495)	1153	93	52.66	+	1.77	3.99×10-03
cellular protein modification process (GO:0006464)	3059	246	139.72	+	1.76	2.21×10-14
protein modification process (GO:0036211)	3059	246	139.72	+	1.76	2.21×10-14
regulation of catalytic activity (GO:0050790)	2306	184	105.33	+	1.75	3.46×10-09
positive regulation of macromolecule metabolic process (GO:0010604)	3270	260	149.36	+	1.74	6.77×10-15
regulation of transcription, DNA-templated (GO:0006355)	3485	276	159.18	+	1.73	5.96×10-16
regulation of multicellular organismal process (GO:0051239)	2981	236	136.16	+	1.73	8.86×10-13
negative regulation of metabolic process (GO:0009892)	2831	224	129.31	+	1.73	7.48×10-12
positive regulation of metabolic process (GO:0009893)	3534	279	161.42	+	1.73	4.26×10-16
regulation of hydrolase activity (GO:0051336)	1280	101	58.46	+	1.73	2.46×10-03
anatomical structure morphogenesis (GO:0009653)	2093	165	95.60	+	1.73	1.93×10-07
positive regulation of intracellular signal transduction (GO:1902533)	1054	83	48.14	+	1.72	3.98×10-02
plasma membrane bounded cell projection organization (GO:0120036)	1081	85	49.38	+	1.72	3.61×10-02
regulation of nucleic acid-templated transcription (GO:1903506)	3537	278	161.55	+	1.72	9.85×10-16
cell projection organization (GO:0030030)	1120	88	51.16	+	1.72	1.88×10-02
positive regulation of cellular protein metabolic process (GO:0032270)	1553	122	70.93	+	1.72	1.49×10-04
regulation of RNA biosynthetic process (GO:2001141)	3545	278	161.92	+	1.72	1.13×10-15
cellular response to organic substance (GO:0071310)	2252	176	102.86	+	1.71	6.47×10-08
positive regulation of multicellular organismal process (GO:0051240)	1690	132	77.19	+	1.71	5.95×10-05
regulation of cellular component organization (GO:0051128)	2470	192	112.82	+	1.70	8.08×10-09
regulation of cell population proliferation (GO:0042127)	1596	124	72.90	+	1.70	2.18×10-04
positive regulation of protein metabolic process (GO:0051247)	1655	128	75.59	+	1.69	1.80×10-04
regulation of cellular macromolecule biosynthetic process (GO:2000112)	3909	301	178.55	+	1.69	2.17×10-16
regulation of macromolecule biosynthetic process (GO:0010556)	4031	310	184.12	+	1.68	5.42×10-17
regulation of RNA metabolic process (GO:0051252)	3784	291	172.84	+	1.68	1.78×10-15
regulation of cellular protein metabolic process (GO:0032268)	2550	194	116.47	+	1.67	4.62×10-08
regulation of cellular biosynthetic process (GO:0031326)	4173	317	190.60	+	1.66	8.05×10-17
positive regulation of signal transduction (GO:0009967)	1581	120	72.21	+	1.66	1.50×10-03
macromolecule modification (GO:0043412)	3267	247	149.22	+	1.66	2.36×10-11
regulation of nucleobase-containing compound metabolic process (GO:0019219)	4063	307	185.58	+	1.65	1.12×10-15
regulation of biosynthetic process (GO:0009889)	4248	320	194.03	+	1.65	2.06×10-16
negative regulation of cellular process (GO:0048523)	4581	345	209.24	+	1.65	2.16×10-18
response to endogenous stimulus (GO:0009719)	1422	107	64.95	+	1.65	1.16×10-02
regulation of molecular function (GO:0065009)	3222	242	147.17	+	1.64	1.03×10-10
regulation of cell communication (GO:0010646)	3514	263	160.50	+	1.64	5.92×10-12
positive regulation of cell communication (GO:0010647)	1736	129	79.29	+	1.63	1.35×10-03
regulation of apoptotic process (GO:0042981)	1508	112	68.88	+	1.63	1.18×10-02
regulation of signaling (GO:0023051)	3542	263	161.78	+	1.63	1.50×10-11
regulation of protein metabolic process (GO:0051246)	2726	202	124.51	+	1.62	1.28×10-07
regulation of signal transduction (GO:0009966)	3158	234	144.24	+	1.62	1.52×10-09
positive regulation of signaling (GO:0023056)	1744	129	79.66	+	1.62	1.47×10-03
regulation of gene expression (GO:0010468)	4396	324	200.79	+	1.61	2.72×10-15
regulation of cell death (GO:0010941)	1645	121	75.14	+	1.61	4.93×10-03
regulation of programmed cell death (GO:0043067)	1523	112	69.56	+	1.61	1.80×10-02
positive regulation of cellular process (GO:0048522)	5280	388	241.17	+	1.61	4.67×10-20
system development (GO:0048731)	4340	317	198.23	+	1.60	2.54×10-14
negative regulation of biological process (GO:0048519)	5148	375	235.14	+	1.59	2.17×10-18
regulation of cellular metabolic process (GO:0031323)	6110	445	279.08	+	1.59	2.66×10-24
phosphorus metabolic process (GO:0006793)	2171	158	99.16	+	1.59	1.29×10-04
negative regulation of response to stimulus (GO:0048585)	1540	112	70.34	+	1.59	2.75×10-02
regulation of primary metabolic process (GO:0080090)	5973	434	272.82	+	1.59	4.66×10-23
regulation of nitrogen compound metabolic process (GO:0051171)	5801	421	264.96	+	1.59	6.74×10-22
cellular protein metabolic process (GO:0044267)	3679	266	168.04	+	1.58	2.14×10-10
phosphate-containing compound metabolic process (GO:0006796)	2144	155	97.93	+	1.58	2.75×10-04
regulation of localization (GO:0032879)	2670	191	121.95	+	1.57	8.37×10-06
response to organic substance (GO:0010033)	2869	205	131.04	+	1.56	1.72×10-06
multicellular organism development (GO:0007275)	4931	352	225.23	+	1.56	2.98×10-15
cellular response to chemical stimulus (GO:0070887)	2760	197	126.06	+	1.56	5.57×10-06
regulation of macromolecule metabolic process (GO:0060255)	6052	429	276.43	+	1.55	1.87×10-20
regulation of metabolic process (GO:0019222)	6571	465	300.13	+	1.55	3.05×10-23
tissue development (GO:0009888)	1717	121	78.42	+	1.54	4.57×10-02
positive regulation of biological process (GO:0048518)	6000	413	274.05	+	1.51	1.24×10-16
cell surface receptor signaling pathway (GO:0007166)	2374	163	108.43	+	1.50	3.18×10-03
cell differentiation (GO:0030154)	3619	248	165.30	+	1.50	5.55×10-07
anatomical structure development (GO:0048856)	5312	364	242.63	+	1.50	3.11×10-13
developmental process (GO:0032502)	5641	384	257.65	+	1.49	6.42×10-14
animal organ development (GO:0048513)	3125	212	142.74	+	1.49	6.62×10-05
cellular developmental process (GO:0048869)	3711	251	169.50	+	1.48	1.48×10-06
cellular macromolecule metabolic process (GO:0044260)	5040	340	230.20	+	1.48	7.47×10-11
cellular localization (GO:0051641)	2388	159	109.07	+	1.46	2.76×10-02
protein metabolic process (GO:0019538)	4365	288	199.37	+	1.44	4.23×10-07
regulation of response to stimulus (GO:0048583)	4232	275	193.30	+	1.42	8.29×10-06
regulation of biological quality (GO:0065008)	3924	254	179.23	+	1.42	6.38×10-05
organelle organization (GO:0006996)	3309	209	151.14	+	1.38	1.49×10-02
signal transduction (GO:0007165)	4898	307	223.72	+	1.37	2.17×10-05
signaling (GO:0023052)	5215	322	238.20	+	1.35	2.94×10-05
cell communication (GO:0007154)	5335	329	243.68	+	1.35	1.92×10-05
regulation of cellular process (GO:0050794)	10812	666	493.84	+	1.35	2.81×10-24
response to chemical (GO:0042221)	4331	261	197.82	+	1.32	1.68×10-02
cellular response to stimulus (GO:0051716)	6484	389	296.16	+	1.31	5.60×10-06
cellular component organization (GO:0016043)	5531	331	252.63	+	1.31	4.12×10-04
regulation of biological process (GO:0050789)	11531	687	526.68	+	1.30	2.40×10-21
macromolecule metabolic process (GO:0043170)	6240	369	285.01	+	1.29	1.29×10-04
multicellular organismal process (GO:0032501)	6827	403	311.83	+	1.29	1.82×10-05
biological regulation (GO:0065007)	12220	715	558.15	+	1.28	4.72×10-21
cellular component organization or biogenesis (GO:0071840)	5714	332	260.99	+	1.27	8.79×10-03
response to stimulus (GO:0050896)	8293	464	378.79	+	1.22	4.64×10-04
cellular process (GO:0009987)	14385	757	657.04	+	1.15	1.86×10-08
biological_process (GO:0008150)	17746	894	810.56	+	1.10	1.02×10-11
detection of stimulus (GO:0051606)	692	8	31.61	-	0.25	1.05×10-02
ncRNA metabolic process (GO:0034660)	537	5	24.53	-	0.20	4.69×10-02
detection of stimulus involved in sensory perception (GO:0050906)	538	3	24.57	-	0.12	1.43×10-03
sensory perception of smell (GO:0007608)	462	2	21.10	-	0.09	3.63×10-03
sensory perception of chemical stimulus (GO:0007606)	534	2	24.39	-	0.08	1.81×10-04

## Sheet: miR-103a-3p
Analysis Type:	PANTHER Overrepresentation Test (Released 20181113)
Annotation Version and Release Date:	GO Ontology database Released 2018-12-01
Analyzed List:	upload_1 (Homo sapiens)
Reference List:	Homo sapiens (all genes in database)
Test Type:	FISHER
Correction:	BONFERRONI
Bonferroni count:	8723
GO biological process complete	Homo sapiens - REFLIST (20996)	Number of genes upload	Expected value	(over/under)	Fold Enrichment	P-value
Wnt signaling pathway (GO:0016055)	305	23	6.48	+	3.55	3.87×10-03
cell-cell signaling by wnt (GO:0198738)	306	23	6.50	+	3.54	4.08×10-03
cell surface receptor signaling pathway involved in cell-cell signaling (GO:1905114)	378	25	8.03	+	3.11	1.19×10-02
cell-cell signaling (GO:0007267)	1037	60	22.03	+	2.72	6.20×10-08
negative regulation of transcription by RNA polymerase II (GO:0000122)	855	43	18.16	+	2.37	3.91×10-03
neuron development (GO:0048666)	801	40	17.01	+	2.35	1.22×10-02
negative regulation of transcription, DNA-templated (GO:0045892)	1180	57	25.07	+	2.27	2.09×10-04
negative regulation of cellular macromolecule biosynthetic process (GO:2000113)	1375	65	29.21	+	2.23	3.58×10-05
negative regulation of nucleic acid-templated transcription (GO:1903507)	1228	57	26.09	+	2.19	7.07×10-04
negative regulation of RNA biosynthetic process (GO:1902679)	1230	57	26.13	+	2.18	7.24×10-04
neuron differentiation (GO:0030182)	989	45	21.01	+	2.14	2.65×10-02
positive regulation of RNA metabolic process (GO:0051254)	1703	77	36.18	+	2.13	5.27×10-06
positive regulation of gene expression (GO:0010628)	1957	88	41.57	+	2.12	4.18×10-07
negative regulation of macromolecule biosynthetic process (GO:0010558)	1450	65	30.80	+	2.11	2.83×10-04
negative regulation of RNA metabolic process (GO:0051253)	1317	59	27.98	+	2.11	1.13×10-03
positive regulation of transcription by RNA polymerase II (GO:0045944)	1199	53	25.47	+	2.08	8.76×10-03
negative regulation of gene expression (GO:0010629)	1689	74	35.88	+	2.06	4.49×10-05
cell development (GO:0048468)	1598	70	33.94	+	2.06	1.45×10-04
negative regulation of cellular biosynthetic process (GO:0031327)	1510	66	32.08	+	2.06	5.19×10-04
cellular response to endogenous stimulus (GO:0071495)	1153	50	24.49	+	2.04	2.84×10-02
neurogenesis (GO:0022008)	1597	69	33.92	+	2.03	2.77×10-04
positive regulation of transcription, DNA-templated (GO:0045893)	1532	66	32.54	+	2.03	6.88×10-04
negative regulation of biosynthetic process (GO:0009890)	1535	66	32.61	+	2.02	7.22×10-04
positive regulation of nucleic acid-templated transcription (GO:1903508)	1618	69	34.37	+	2.01	5.13×10-04
positive regulation of RNA biosynthetic process (GO:1902680)	1619	69	34.39	+	2.01	5.20×10-04
negative regulation of nucleobase-containing compound metabolic process (GO:0045934)	1450	61	30.80	+	1.98	6.74×10-03
positive regulation of nucleobase-containing compound metabolic process (GO:0045935)	1889	79	40.13	+	1.97	9.46×10-05
positive regulation of macromolecule biosynthetic process (GO:0010557)	1871	78	39.74	+	1.96	1.36×10-04
generation of neurons (GO:0048699)	1499	62	31.84	+	1.95	6.83×10-03
nervous system development (GO:0007399)	2305	93	48.96	+	1.90	2.56×10-05
negative regulation of nitrogen compound metabolic process (GO:0051172)	2334	94	49.58	+	1.90	1.96×10-05
positive regulation of cellular biosynthetic process (GO:0031328)	1965	78	41.74	+	1.87	1.11×10-03
negative regulation of macromolecule metabolic process (GO:0010605)	2589	102	55.00	+	1.85	1.05×10-05
positive regulation of biosynthetic process (GO:0009891)	1997	78	42.42	+	1.84	2.14×10-03
anatomical structure morphogenesis (GO:0009653)	2093	81	44.46	+	1.82	1.65×10-03
establishment of localization in cell (GO:0051649)	1789	69	38.00	+	1.82	1.95×10-02
cellular protein modification process (GO:0006464)	3059	116	64.98	+	1.79	4.62×10-06
protein modification process (GO:0036211)	3059	116	64.98	+	1.79	4.62×10-06
positive regulation of macromolecule metabolic process (GO:0010604)	3270	124	69.46	+	1.79	7.09×10-07
cellular localization (GO:0051641)	2388	90	50.73	+	1.77	1.02×10-03
positive regulation of cellular metabolic process (GO:0031325)	3246	122	68.95	+	1.77	2.20×10-06
regulation of multicellular organismal development (GO:2000026)	1945	73	41.32	+	1.77	3.05×10-02
negative regulation of metabolic process (GO:0009892)	2831	106	60.14	+	1.76	6.76×10-05
positive regulation of nitrogen compound metabolic process (GO:0051173)	3128	117	66.45	+	1.76	7.17×10-06
positive regulation of metabolic process (GO:0009893)	3534	132	75.07	+	1.76	4.48×10-07
macromolecule modification (GO:0043412)	3267	122	69.40	+	1.76	3.74×10-06
negative regulation of cellular metabolic process (GO:0031324)	2501	93	53.13	+	1.75	1.20×10-03
regulation of transcription by RNA polymerase II (GO:0006357)	2656	97	56.42	+	1.72	1.17×10-03
negative regulation of cellular process (GO:0048523)	4581	166	97.31	+	1.71	2.59×10-09
regulation of developmental process (GO:0050793)	2486	89	52.81	+	1.69	1.19×10-02
negative regulation of biological process (GO:0048519)	5148	182	109.35	+	1.66	7.68×10-10
regulation of gene expression (GO:0010468)	4396	155	93.38	+	1.66	2.97×10-07
regulation of RNA metabolic process (GO:0051252)	3784	133	80.38	+	1.65	1.73×10-05
cell differentiation (GO:0030154)	3619	127	76.88	+	1.65	6.13×10-05
cellular developmental process (GO:0048869)	3711	129	78.83	+	1.64	8.61×10-05
cellular protein metabolic process (GO:0044267)	3679	127	78.15	+	1.63	1.63×10-04
regulation of protein metabolic process (GO:0051246)	2726	94	57.91	+	1.62	2.24×10-02
regulation of nucleobase-containing compound metabolic process (GO:0019219)	4063	140	86.31	+	1.62	2.16×10-05
positive regulation of cellular process (GO:0048522)	5280	181	112.16	+	1.61	1.56×10-08
regulation of cellular macromolecule biosynthetic process (GO:2000112)	3909	134	83.04	+	1.61	8.23×10-05
regulation of macromolecule metabolic process (GO:0060255)	6052	207	128.56	+	1.61	9.49×10-11
regulation of transcription, DNA-templated (GO:0006355)	3485	119	74.03	+	1.61	1.06×10-03
regulation of macromolecule biosynthetic process (GO:0010556)	4031	137	85.63	+	1.60	8.58×10-05
regulation of primary metabolic process (GO:0080090)	5973	203	126.88	+	1.60	4.11×10-10
regulation of nucleic acid-templated transcription (GO:1903506)	3537	120	75.13	+	1.60	1.27×10-03
regulation of RNA biosynthetic process (GO:2001141)	3545	120	75.30	+	1.59	1.33×10-03
regulation of nitrogen compound metabolic process (GO:0051171)	5801	196	123.23	+	1.59	3.02×10-09
regulation of cellular metabolic process (GO:0031323)	6110	206	129.79	+	1.59	4.30×10-10
system development (GO:0048731)	4340	146	92.19	+	1.58	3.74×10-05
regulation of metabolic process (GO:0019222)	6571	220	139.58	+	1.58	5.00×10-11
regulation of cellular biosynthetic process (GO:0031326)	4173	139	88.64	+	1.57	1.98×10-04
regulation of biological quality (GO:0065008)	3924	130	83.35	+	1.56	1.06×10-03
regulation of cell communication (GO:0010646)	3514	116	74.64	+	1.55	9.16×10-03
regulation of biosynthetic process (GO:0009889)	4248	140	90.24	+	1.55	3.43×10-04
multicellular organism development (GO:0007275)	4931	162	104.74	+	1.55	1.63×10-05
anatomical structure development (GO:0048856)	5312	174	112.84	+	1.54	3.55×10-06
developmental process (GO:0032502)	5641	184	119.83	+	1.54	9.15×10-07
regulation of signaling (GO:0023051)	3542	115	75.24	+	1.53	2.57×10-02
positive regulation of biological process (GO:0048518)	6000	194	127.45	+	1.52	3.44×10-07
protein metabolic process (GO:0019538)	4365	139	92.72	+	1.50	3.27×10-03
signaling (GO:0023052)	5215	166	110.78	+	1.50	9.12×10-05
cell communication (GO:0007154)	5335	167	113.33	+	1.47	3.03×10-04
transport (GO:0006810)	4430	138	94.10	+	1.47	1.28×10-02
cellular macromolecule metabolic process (GO:0044260)	5040	157	107.06	+	1.47	1.52×10-03
localization (GO:0051179)	5607	174	119.10	+	1.46	2.01×10-04
establishment of localization (GO:0051234)	4552	141	96.69	+	1.46	1.23×10-02
macromolecule metabolic process (GO:0043170)	6240	189	132.55	+	1.43	2.21×10-04
signal transduction (GO:0007165)	4898	147	104.04	+	1.41	3.96×10-02
cellular component organization (GO:0016043)	5531	163	117.49	+	1.39	2.53×10-02
multicellular organismal process (GO:0032501)	6827	197	145.02	+	1.36	3.49×10-03
regulation of cellular process (GO:0050794)	10812	307	229.67	+	1.34	1.84×10-09
regulation of biological process (GO:0050789)	11531	320	244.94	+	1.31	5.76×10-09
biological regulation (GO:0065007)	12220	338	259.58	+	1.30	1.64×10-10
cellular process (GO:0009987)	14385	373	305.57	+	1.22	5.46×10-09
biological_process (GO:0008150)	17746	424	376.96	+	1.12	5.08×10-08

## Sheet: miR-29a-3p
Analysis Type:	PANTHER Overrepresentation Test (Released 20181113)
Annotation Version and Release Date:	GO Ontology database Released 2018-12-01
Analyzed List:	upload_1 (Homo sapiens)
Reference List:	Homo sapiens (all genes in database)
Test Type:	FISHER
Correction:	BONFERRONI
Bonferroni count:	8723
GO biological process complete	Homo sapiens - REFLIST (20996)	Number of genes upload	Expected value	(over/under)	Fold Enrichment	P-value
collagen-activated signaling pathway (GO:0038065)	13	7	.49	+	14.35	3.53×10-02
collagen fibril organization (GO:0030199)	46	14	1.73	+	8.11	1.89×10-04
extracellular matrix organization (GO:0030198)	328	52	12.31	+	4.22	1.18×10-12
homophilic cell adhesion via plasma membrane adhesion molecules (GO:0007156)	166	24	6.23	+	3.85	9.23×10-04
extracellular structure organization (GO:0043062)	373	53	14.00	+	3.79	3.52×10-11
cellular response to transforming growth factor beta stimulus (GO:0071560)	149	20	5.59	+	3.58	2.93×10-02
cell-cell adhesion via plasma-membrane adhesion molecules (GO:0098742)	255	31	9.57	+	3.24	5.02×10-04
bone development (GO:0060348)	193	23	7.24	+	3.18	3.44×10-02
regulation of gene expression, epigenetic (GO:0040029)	225	25	8.44	+	2.96	4.11×10-02
response to alcohol (GO:0097305)	239	26	8.97	+	2.90	3.79×10-02
muscle structure development (GO:0061061)	467	42	17.53	+	2.40	6.78×10-03
cell-cell adhesion (GO:0098609)	492	44	18.47	+	2.38	3.98×10-03
reproductive structure development (GO:0048608)	420	37	15.76	+	2.35	4.77×10-02
vasculature development (GO:0001944)	507	43	19.03	+	2.26	2.02×10-02
cell adhesion (GO:0007155)	915	77	34.34	+	2.24	2.35×10-06
biological adhesion (GO:0022610)	921	77	34.57	+	2.23	2.89×10-06
cardiovascular system development (GO:0072358)	517	43	19.40	+	2.22	4.19×10-02
negative regulation of cell differentiation (GO:0045596)	689	57	25.86	+	2.20	1.03×10-03
neuron projection development (GO:0031175)	657	54	24.66	+	2.19	2.83×10-03
regulation of neuron differentiation (GO:0045664)	642	52	24.09	+	2.16	6.63×10-03
negative regulation of developmental process (GO:0051093)	923	74	34.64	+	2.14	4.48×10-05
neuron development (GO:0048666)	801	63	30.06	+	2.10	1.09×10-03
cell morphogenesis (GO:0000902)	693	54	26.01	+	2.08	1.61×10-02
regulation of cell development (GO:0060284)	913	71	34.27	+	2.07	3.08×10-04
circulatory system development (GO:0072359)	853	66	32.01	+	2.06	9.51×10-04
regulation of neurogenesis (GO:0050767)	793	61	29.76	+	2.05	4.11×10-03
chromatin organization (GO:0006325)	691	52	25.93	+	2.01	4.73×10-02
negative regulation of transcription by RNA polymerase II (GO:0000122)	855	64	32.09	+	1.99	4.44×10-03
head development (GO:0060322)	775	58	29.09	+	1.99	2.19×10-02
central nervous system development (GO:0007417)	953	71	35.77	+	1.99	1.54×10-03
neuron differentiation (GO:0030182)	989	73	37.12	+	1.97	1.11×10-03
nervous system development (GO:0007399)	2305	170	86.51	+	1.97	5.17×10-13
cellular component morphogenesis (GO:0032989)	792	58	29.72	+	1.95	3.03×10-02
regulation of anatomical structure morphogenesis (GO:0022603)	1011	73	37.94	+	1.92	3.40×10-03
positive regulation of transcription by RNA polymerase II (GO:0045944)	1199	84	45.00	+	1.87	1.04×10-03
positive regulation of nucleic acid-templated transcription (GO:1903508)	1618	113	60.73	+	1.86	5.72×10-06
positive regulation of RNA biosynthetic process (GO:1902680)	1619	113	60.76	+	1.86	5.82×10-06
positive regulation of RNA metabolic process (GO:0051254)	1703	118	63.92	+	1.85	3.90×10-06
regulation of cell differentiation (GO:0045595)	1733	120	65.04	+	1.84	2.39×10-06
positive regulation of transcription, DNA-templated (GO:0045893)	1532	105	57.50	+	1.83	6.76×10-05
anatomical structure morphogenesis (GO:0009653)	2093	142	78.55	+	1.81	1.66×10-07
positive regulation of cellular component organization (GO:0051130)	1209	82	45.37	+	1.81	5.87×10-03
negative regulation of multicellular organismal process (GO:0051241)	1167	79	43.80	+	1.80	9.13×10-03
cellular response to endogenous stimulus (GO:0071495)	1153	78	43.27	+	1.80	1.15×10-02
negative regulation of cellular biosynthetic process (GO:0031327)	1510	102	56.67	+	1.80	2.72×10-04
negative regulation of biosynthetic process (GO:0009890)	1535	103	57.61	+	1.79	2.48×10-04
cell development (GO:0048468)	1598	107	59.97	+	1.78	1.91×10-04
neurogenesis (GO:0022008)	1597	106	59.94	+	1.77	2.84×10-04
system development (GO:0048731)	4340	288	162.88	+	1.77	9.61×10-20
positive regulation of nucleobase-containing compound metabolic process (GO:0045935)	1889	125	70.90	+	1.76	1.61×10-05
generation of neurons (GO:0048699)	1499	99	56.26	+	1.76	1.19×10-03
negative regulation of nucleic acid-templated transcription (GO:1903507)	1228	81	46.09	+	1.76	2.24×10-02
negative regulation of RNA biosynthetic process (GO:1902679)	1230	81	46.16	+	1.75	2.28×10-02
positive regulation of macromolecule biosynthetic process (GO:0010557)	1871	123	70.22	+	1.75	3.03×10-05
regulation of developmental process (GO:0050793)	2486	163	93.30	+	1.75	4.55×10-08
negative regulation of macromolecule biosynthetic process (GO:0010558)	1450	95	54.42	+	1.75	3.55×10-03
negative regulation of cellular macromolecule biosynthetic process (GO:2000113)	1375	90	51.61	+	1.74	6.05×10-03
negative regulation of transcription, DNA-templated (GO:0045892)	1180	77	44.29	+	1.74	4.78×10-02
regulation of multicellular organismal development (GO:2000026)	1945	126	73.00	+	1.73	3.98×10-05
response to oxygen-containing compound (GO:1901700)	1498	97	56.22	+	1.73	3.69×10-03
positive regulation of gene expression (GO:0010628)	1957	126	73.45	+	1.72	6.19×10-05
positive regulation of cellular biosynthetic process (GO:0031328)	1965	126	73.75	+	1.71	6.92×10-05
positive regulation of biosynthetic process (GO:0009891)	1997	128	74.95	+	1.71	5.86×10-05
intracellular signal transduction (GO:0035556)	1659	106	62.26	+	1.70	2.11×10-03
negative regulation of RNA metabolic process (GO:0051253)	1317	84	49.43	+	1.70	4.68×10-02
multicellular organism development (GO:0007275)	4931	314	185.07	+	1.70	1.72×10-19
response to endogenous stimulus (GO:0009719)	1422	90	53.37	+	1.69	2.55×10-02
anatomical structure development (GO:0048856)	5312	331	199.36	+	1.66	1.61×10-19
regulation of transcription by RNA polymerase II (GO:0006357)	2656	165	99.68	+	1.66	1.65×10-06
animal organ development (GO:0048513)	3125	194	117.28	+	1.65	2.61×10-08
regulation of cellular component organization (GO:0051128)	2470	153	92.70	+	1.65	1.16×10-05
negative regulation of gene expression (GO:0010629)	1689	104	63.39	+	1.64	1.47×10-02
developmental process (GO:0032502)	5641	347	211.71	+	1.64	3.86×10-20
regulation of multicellular organismal process (GO:0051239)	2981	182	111.88	+	1.63	5.45×10-07
positive regulation of cellular metabolic process (GO:0031325)	3246	195	121.83	+	1.60	3.27×10-07
positive regulation of macromolecule metabolic process (GO:0010604)	3270	196	122.73	+	1.60	3.67×10-07
positive regulation of nitrogen compound metabolic process (GO:0051173)	3128	186	117.40	+	1.58	2.51×10-06
positive regulation of metabolic process (GO:0009893)	3534	210	132.63	+	1.58	1.05×10-07
regulation of transcription, DNA-templated (GO:0006355)	3485	205	130.80	+	1.57	5.83×10-07
regulation of nucleic acid-templated transcription (GO:1903506)	3537	208	132.75	+	1.57	3.93×10-07
regulation of RNA biosynthetic process (GO:2001141)	3545	208	133.05	+	1.56	4.21×10-07
regulation of biosynthetic process (GO:0009889)	4248	248	159.43	+	1.56	3.10×10-09
regulation of macromolecule biosynthetic process (GO:0010556)	4031	235	151.29	+	1.55	2.24×10-08
cellular protein modification process (GO:0006464)	3059	178	114.81	+	1.55	4.23×10-05
protein modification process (GO:0036211)	3059	178	114.81	+	1.55	4.23×10-05
regulation of RNA metabolic process (GO:0051252)	3784	219	142.02	+	1.54	3.57×10-07
regulation of cellular macromolecule biosynthetic process (GO:2000112)	3909	226	146.71	+	1.54	1.73×10-07
regulation of cellular biosynthetic process (GO:0031326)	4173	240	156.62	+	1.53	4.32×10-08
cell differentiation (GO:0030154)	3619	207	135.82	+	1.52	5.27×10-06
cellular developmental process (GO:0048869)	3711	212	139.28	+	1.52	3.12×10-06
positive regulation of cellular process (GO:0048522)	5280	298	198.16	+	1.50	1.58×10-10
regulation of nucleobase-containing compound metabolic process (GO:0019219)	4063	229	152.49	+	1.50	1.18×10-06
cellular component organization (GO:0016043)	5531	310	207.58	+	1.49	5.74×10-11
negative regulation of cellular metabolic process (GO:0031324)	2501	140	93.86	+	1.49	2.38×10-02
macromolecule modification (GO:0043412)	3267	182	122.61	+	1.48	5.96×10-04
regulation of gene expression (GO:0010468)	4396	244	164.99	+	1.48	9.09×10-07
negative regulation of cellular process (GO:0048523)	4581	253	171.93	+	1.47	5.31×10-07
negative regulation of metabolic process (GO:0009892)	2831	155	106.25	+	1.46	2.11×10-02
response to organic substance (GO:0010033)	2869	157	107.68	+	1.46	1.85×10-02
cellular component organization or biogenesis (GO:0071840)	5714	311	214.45	+	1.45	2.48×10-09
positive regulation of biological process (GO:0048518)	6000	325	225.19	+	1.44	8.72×10-10
cellular protein metabolic process (GO:0044267)	3679	197	138.08	+	1.43	2.33×10-03
regulation of signaling (GO:0023051)	3542	189	132.93	+	1.42	5.55×10-03
negative regulation of biological process (GO:0048519)	5148	274	193.21	+	1.42	2.88×10-06
regulation of cell communication (GO:0010646)	3514	187	131.88	+	1.42	8.39×10-03
regulation of primary metabolic process (GO:0080090)	5973	315	224.17	+	1.41	9.06×10-08
multicellular organismal process (GO:0032501)	6827	358	256.22	+	1.40	1.43×10-09
regulation of macromolecule metabolic process (GO:0060255)	6052	317	227.14	+	1.40	1.87×10-07
regulation of cellular metabolic process (GO:0031323)	6110	318	229.31	+	1.39	3.67×10-07
cellular macromolecule metabolic process (GO:0044260)	5040	262	189.16	+	1.39	8.70×10-05
regulation of nitrogen compound metabolic process (GO:0051171)	5801	301	217.72	+	1.38	2.76×10-06
regulation of metabolic process (GO:0019222)	6571	340	246.62	+	1.38	6.34×10-08
protein metabolic process (GO:0019538)	4365	223	163.82	+	1.36	7.99×10-03
macromolecule metabolic process (GO:0043170)	6240	298	234.19	+	1.27	1.67×10-02
regulation of cellular process (GO:0050794)	10812	513	405.78	+	1.26	3.60×10-10
regulation of biological process (GO:0050789)	11531	533	432.77	+	1.23	9.71×10-09
biological regulation (GO:0065007)	12220	558	458.63	+	1.22	6.03×10-09
cellular process (GO:0009987)	14385	623	539.88	+	1.15	9.30×10-07
biological_process (GO:0008150)	17746	732	666.02	+	1.10	2.51×10-08
detection of chemical stimulus (GO:0009593)	518	2	19.44	-	.10	1.73×10-02
sensory perception of smell (GO:0007608)	462	1	17.34	-	.06	8.60×10-03
sensory perception of chemical stimulus (GO:0007606)	534	1	20.04	-	.05	9.10×10-04
